# Supplementary material for: Upregulation of the GLT-1 expression attenuates neuronal apoptosis and cognitive dysfunction via inhibiting the CB1-PKA-CREB signaling pathway in mice with traumatic brain injury
Source: Research Square preprint supplement (doi:10.21203/rs.3.rs-5901123/v1), 2025-02-04
Supplement: Supplementary file 1 [file 78d4f2a5c7bfad721711d96f.docx]

| Antibody | Art.No. | Supplier | Dilution ratio | Host | Used for |
| --- | --- | --- | --- | --- | --- |
| GLT-1 | sc-365634 | Santa Cruz | 1:500 | Mouse | WB |
| CREB | 67927-1-Ig | Proteintech | 1:1000 | Mouse | WB |
| P-CREB | ABP0033 | Abbkine | 1:1000 | Rabbit | WB |
| PKA | sc-28315 | Santa Cruz | 1:500 | Mouse | WB |
| P-PKA | sc-293036 | Santa Cruz | 1:500 | Mouse | WB |
| β-Actin  GLT-1  CREB  P-CREB  P65  GFAP  GFAP | TA-09  sc-365634  sc-377154  ABP0033  D14E12  60190-1-Ig  16825-1-Ig | ZSGB-BIO  Santa Cruz  Santa Cruz  Abbkine  CST  Proteintech  Proteintech | 1:2000  1:50  1:50  1:1000  1:100  1:100  1:400 | Mouse  Mouse  Mouse  Rabbit  Rabbit  Mouse  Rabbit | WB  IF  IF  IF  IF  IF  IF |

**Table S1 Antibody for WB and IF**


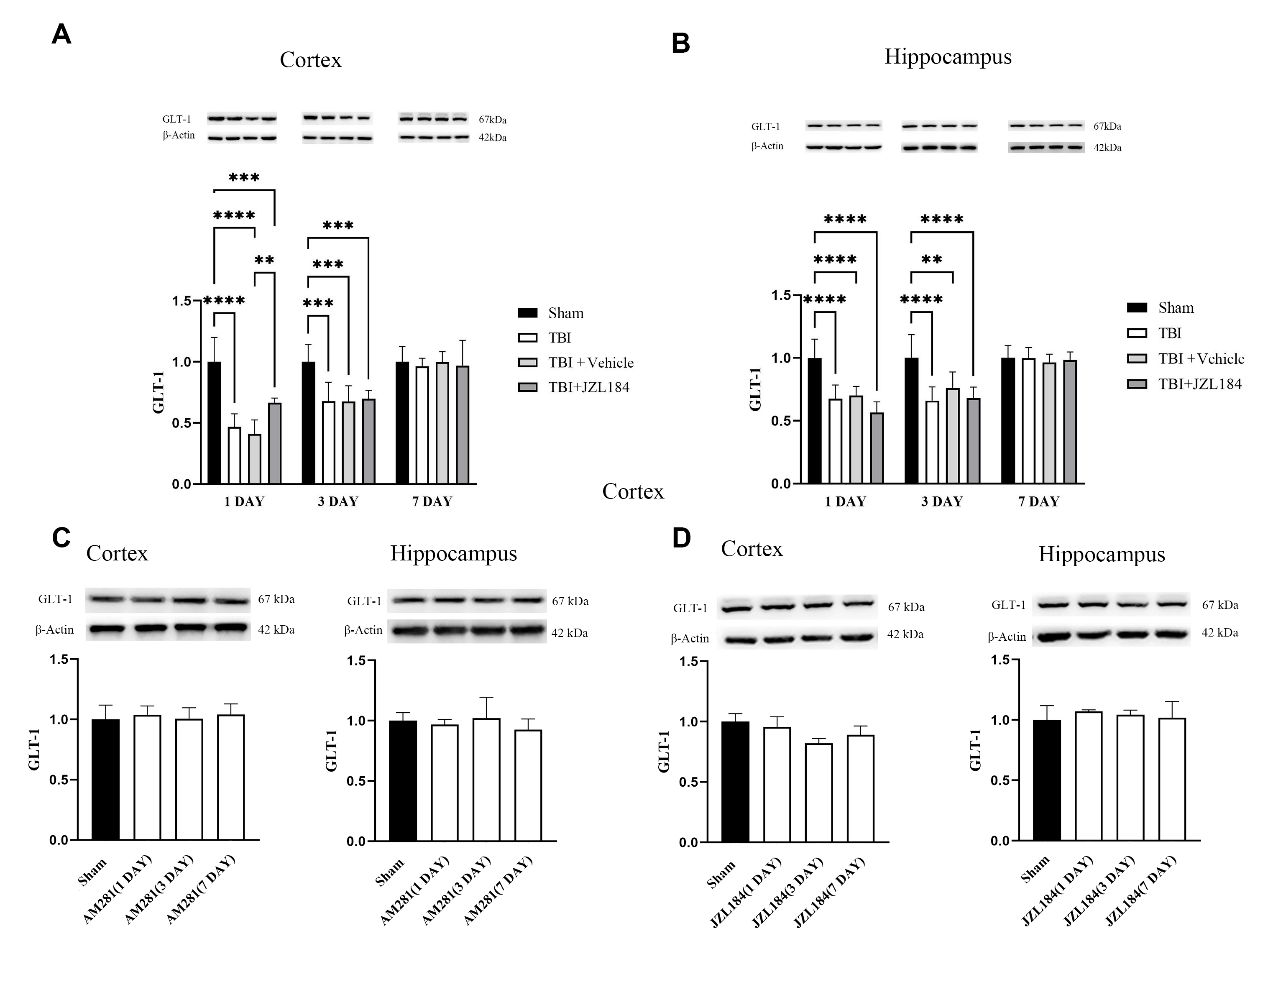
**Fig. S1 Inhibition of 2-AG degradation did not reverse the decrease of GLT-1 caused by TBI.**

A, B: Western blotting analysis of GLT-1 in the cortex (A) and hippocampus (B) of TBI mice at different time points post-TBI. C, D: Western blotting analysis of GLT-1 in the cortex and hippocampus of Sham, Sham+AM281 (C), and Sham+JZL184 (D) group on days 1,3,7 post-injecting. n=6 mice per group. All data were presented with the mean ± SEM. *p＜0.05, **p＜0.01, ***p＜0.001, ****p＜0.0001.


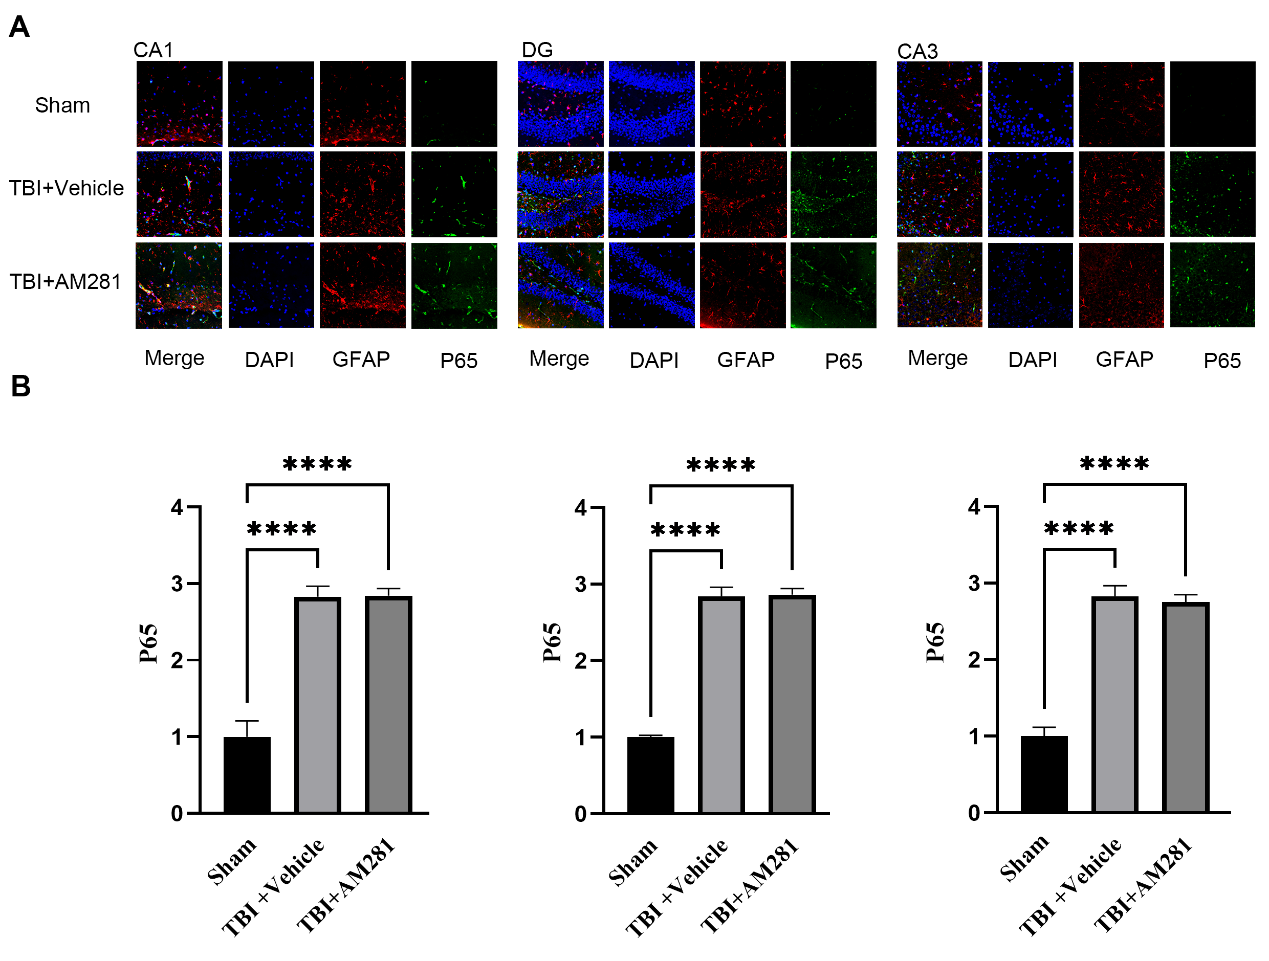


**Fig. S2 TBI-induced upregulation of P65 expression in astrocytes was not reversed by inhibiting the CB1 receptor.**

A: Representative immunofluorescent images demonstrating the expression of GFAP (Red), and P65 (Green) in the CA1, DG, and CA3 of Sham, TBI+AM281, and TBI+Vehicle group on day 1 post-TBI. B: Quantification of immunofluorescence images in A. n= 9 slices from 3 mice per group. All data were presented with the mean ± SEM. *p＜0.05, **p＜0.01, ***p＜0.001, ****p＜0.0001.
